# Supplementary material for: Unmet needs in occupational health: prevention and management of viral hepatitis in healthcare workers in Ho Chi Minh City, Vietnam: a mixed-methods study
Source: PubMed Central journal article supplement — BMJ Open. 2021 Oct 12;11(10):e052668. doi: 10.1136/bmjopen-2021-052668 (PMC8513255; doi:10.1136/bmjopen-2021-052668), 2021-10-12
Supplement: bmjopen-2021-052668supp001.pdf [file bmjopen-2021-052668supp001.pdf]

**SUPPLEMENTS****Table 1: KAP survey results stratified among types of clinical work**

| <b>Statements about HBV or HCV</b>                                 | <b>Total<br/>n<br/>(N=203)</b> | <b>Physicians<br/>n (%)<br/>(n=39)</b> | <b>Nurses &amp;<br/>midwives<br/>n (%)<br/>(n=140)</b> | <b>Other<br/>HCWs<br/>n (%)<br/>(n=24)</b> |
|--------------------------------------------------------------------|--------------------------------|----------------------------------------|--------------------------------------------------------|--------------------------------------------|
| Smoking can cause hepatitis                                        | 35                             | 7 (20)                                 | 23 (65.71)                                             | 5 (14.29)                                  |
| Don't know if smoking can cause hepatitis                          | 9                              | 0                                      | 8 (88.89)                                              | 1 (11.11)                                  |
| Hepatitis can be spread by sharing eating utensils                 | 90                             | 19 (21.11)                             | 63 (70)                                                | 8 (8.89)                                   |
| Don't know if hepatitis can be spread by sharing eating utensils   | 8                              | 0                                      | 6 (75)                                                 | 2 (25)                                     |
| Either HBV or HCV can not be spread by sharing toothbrushes        | 22                             | 4 (18.18)                              | 16 (72.73)                                             | 2 (9.09)                                   |
| Don't know if hepatitis can be spread by sharing toothbrushes      | 4                              | 0                                      | 2 (50)                                                 | 2 (50)                                     |
| Hepatitis can be spread by sneezing                                | 58                             | 10 (17.24)                             | 41 (70.69)                                             | 7 (12.07)                                  |
| Don't know if hepatitis can be spread by sneezing                  | 10                             | 1 (10)                                 | 7 (70)                                                 | 2 (20)                                     |
| Hepatitis can not be spread via sexual intercourse                 | 9                              | 0                                      | 7 (77.78)                                              | 2 (22.22)                                  |
| Don't know if hepatitis can be spread via sexual intercourse       | 1                              | 0                                      | 1 (100)                                                | 0                                          |
| Hepatitis can not be spread by sharing needles                     | 1                              | 0                                      | 0                                                      | 1 (100)                                    |
| Don't know if hepatitis can be spread by sharing needles           | 1                              | 0                                      | 1 (100)                                                | 0                                          |
| Neonates can not acquire hepatitis at birth                        | 0                              | 0                                      | 0                                                      | 0                                          |
| Don't know if neonates can acquire hepatitis at birth              | 4                              | 0                                      | 3 (75)                                                 | 1 (25)                                     |
| Hepatitis can not be spread by someone who looks healthy           | 6                              | 0                                      | 5 (83.33)                                              | 1 (16.67)                                  |
| Don't know if hepatitis can be spread by someone who looks healthy | 16                             | 1 (6.25)                               | 13 (81.25)                                             | 2 (12.5)                                   |

| <b>Statements about HBV or HCV</b>                             | <b>Total<br/>n<br/>(N=203)</b> | <b>Physicians<br/>n (%)<br/>(n=39)</b> | <b>Nurses &amp;<br/>midwives<br/>n (%)<br/>(n=140)</b> | <b>Other<br/>HCWs<br/>n (%)<br/>(n=24)</b> |
|----------------------------------------------------------------|--------------------------------|----------------------------------------|--------------------------------------------------------|--------------------------------------------|
| Hepatitis can not cause life-long infection                    | 29                             | 7 (24.14)                              | 18 (62.07)                                             | 4 (13.79)                                  |
| Don't know if hepatitis can cause life-long infection          | 13                             | 0                                      | 11 (84.62)                                             | 2 (15.38)                                  |
| Hepatitis can not cause liver cancer                           | 6                              | 0                                      | 6 (100)                                                | 0                                          |
| Don't know if hepatitis can cause liver cancer                 | 5                              | 0                                      | 4 (80)                                                 | 1 (20)                                     |
| Hepatitis cannot be lethal                                     | 14                             | 1 (7.14)                               | 8 (57.14)                                              | 5 (35.72)                                  |
| Don't know if hepatitis can be lethal                          | 14                             | 0                                      | 14 (100)                                               | 0                                          |
| Hepatitis is not treatable                                     | 43                             | 4 (9.30)                               | 34 (79.07)                                             | 5 (11.63)                                  |
| Don't know if hepatitis is treatable                           | 7                              | 0                                      | 6 (85.71)                                              | 1 (14.29)                                  |
| People with hepatitis should be avoided                        | 29                             | 5 (17.24)                              | 20 (68.97)                                             | 4 (13.79)                                  |
| Don't know if need to avoid people with hepatitis              | 5                              | 2 (40)                                 | 2 (40)                                                 | 1 (20)                                     |
| I do not have a life-long risk of contracting hepatitis        | 8                              | 1 (12.5)                               | 5 (62.5)                                               | 2 (25)                                     |
| Don't know if I have a life-long risk of contracting hepatitis | 24                             | 3 (12.5)                               | 15 (62.5)                                              | 6 (25)                                     |
| Hepatitis B vaccine is not effective                           | 8                              | 1 (12.5)                               | 7 (87.5)                                               | 0                                          |
| Don't know if vaccine is effective                             | 6                              | 0                                      | 3 (50)                                                 | 3 (50)                                     |
| Hepatitis B vaccine has harmful side effects                   | 42                             | 11 (26.19)                             | 28 (66.67)                                             | 3 (7.14)                                   |
| Don't know if hepatitis B vaccine has harmful side effects     | 40                             | 2 (5)                                  | 30 (75)                                                | 8 (20)                                     |

**Table 2: Post-exposure management of health care workers after occupational percutaneous and mucosal exposure to blood and body fluids, by health care workers' hepatitis B vaccination and response status.**

| Health care worker status                                     | Post-exposure testing  |                          | Post-exposure prophylaxis    |                        | Post-vaccination serologic testing <sup>b</sup> |
|---------------------------------------------------------------|------------------------|--------------------------|------------------------------|------------------------|-------------------------------------------------|
|                                                               | Source patient (HBsAg) | HCW testing (anti-HBs)   | HBIG <sup>a</sup>            | Vaccination            |                                                 |
| Documented responder <sup>c</sup> after complete series       | No action needed       |                          |                              |                        |                                                 |
| Documented non-responder <sup>d</sup> after 2 complete series | Positive/unknown       | Not indicated            | HBIG x2 separated by 1 month | —                      | No                                              |
|                                                               | Negative               | No action needed         |                              |                        |                                                 |
| Response unknown after complete series                        | Positive/unknown       | < 10 mIU/mL <sup>e</sup> | HBIG x1                      | Initiate revaccination | Yes                                             |
|                                                               | Negative               | < 10 mIU/mL              | None                         |                        |                                                 |
|                                                               | Any result             | ≥ 10 mIU/mL              | No action needed             |                        |                                                 |
| Unvaccinated / incompletely vaccinated or vaccine refusers    | Positive/unknown       | — <sup>e</sup>           | HBIG x1                      | Complete vaccination   | Yes                                             |
|                                                               | Negative               | —                        | None                         | Complete vaccination   | Yes                                             |

anti-HBs, antibody to hepatitis B surface antigen; HBsAg, hepatitis B surface antigen; HBIG, hepatitis B immune globulin; HCW, health care workers.

<sup>a</sup> HBIG should be administered intramuscularly as soon as possible after exposure when indicated. The effectiveness of HBIG when administered >7 days after percutaneous, mucosal, or nonintact skin exposures is unknown. HBIG dosage = 0.06 mL/kg.

<sup>b</sup> Should be performed 1–2 months after the last dose of the hepatitis B vaccine series (and 6 months after administration of HBIG to avoid detection of passively administered anti-HBs) using a quantitative method that allows detection of the protective concentration of anti-HBs (≥10 mIU/mL).

<sup>c</sup> A responder is defined as a person with anti-HBs ≥10 mIU/mL after ≥1 complete series of hepatitis B vaccine.

<sup>d</sup> A nonresponder is defined as a person with anti-HBs <10 mIU/mL after 2 complete series of hepatitis B vaccine.

<sup>e</sup> HCW who have anti-HBs <10 mIU/mL, or who are unvaccinated or incompletely vaccinated, and sustain an exposure to a source patient who is HBsAg (+) or has unknown HBsAg status, should undergo baseline testing for HBV infection as soon as possible after exposure, and follow-up testing approximately 6 months later. Initial baseline tests consist of total anti-HBc; testing at ~6 months consists of HBsAg and total anti-HBc.

**Adapted from** Schillie S, Murphy TV, Sawyer M, et al. CDC Guidance for evaluating health-care personnel for hepatitis B virus protection and for administering postexposure management. Published December 20, 2013 Accessed April 1, 2021. <https://www.cdc.gov/mmwr/preview/mmwrhtml/rr6210a1.htm>

**Figure 1: Hepatitis C virus post-exposure management of health care workers after occupational percutaneous and mucosal exposure to blood and body fluids**

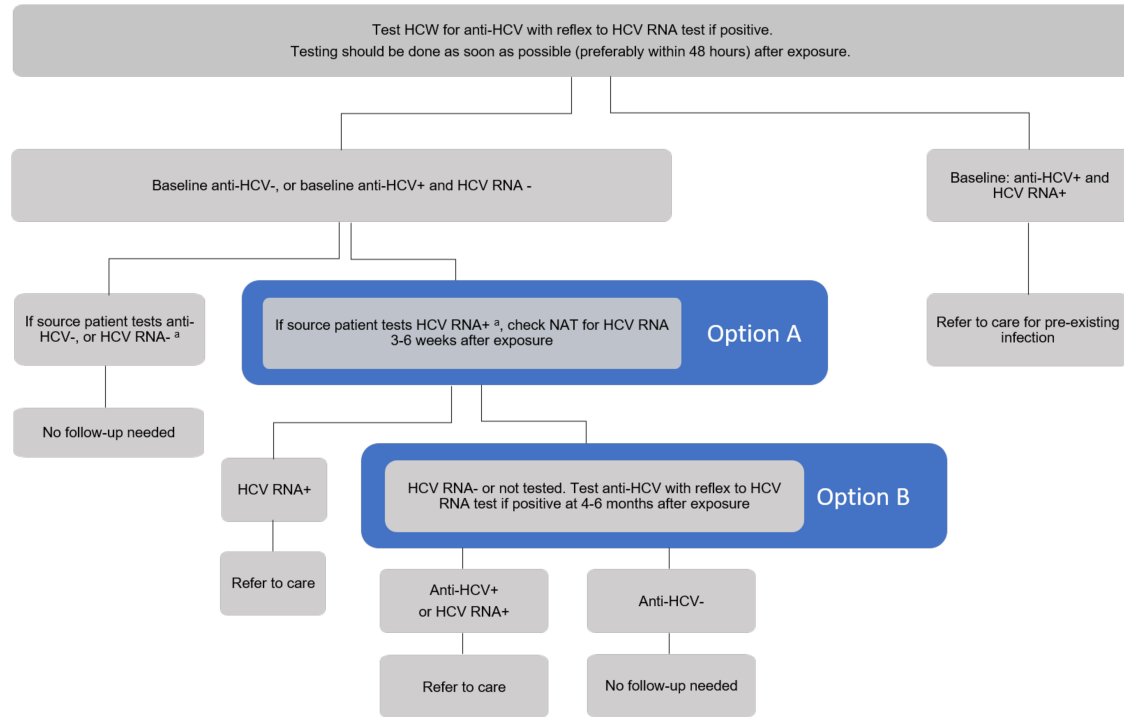

HCV, hepatitis C virus; HCW, health care workers; NAT, nucleic acid test.

<sup>a</sup> Testing of the source patient may follow option A (preferred) or option B.

**Adapted from** Moorman AC, de Perio MA, Goldschmidt R, et al. Testing and clinical management of health care personnel potentially exposed to hepatitis C virus - CDC Guidance, United States, 2020. Published July 24, 2020. Accessed April 1, 2021.

[https://www.cdc.gov/mmwr/volumes/69/rr/rr6906a1.htm?s\\_cid=rr6906a1\\_w](https://www.cdc.gov/mmwr/volumes/69/rr/rr6906a1.htm?s_cid=rr6906a1_w)
